# Supplementary material for: Wastewater-Based Epidemiology and Long-Read Sequencing to Identify Enterovirus Circulation in Three Municipalities in Maricopa County, Arizona, Southwest United States between June and October 2020
Source: MDPI journal article supplement (doi:10.3390/v13091803), 2021-09-10
Supplement: s1 [file s1]

**Table S1.** Sequencing details for each site and sampling day including reads, contigs, and variants of EV types recovered using the Sanger and LRI workflows.

| Site # | Sampling day | SSW                                    | LRISW     |               |            |                         |                              |                      |                              |                      |
|--------|--------------|----------------------------------------|-----------|---------------|------------|-------------------------|------------------------------|----------------------|------------------------------|----------------------|
|        |              | EV-type                                | Raw Reads | Total Contigs | EV contigs | Deduplicated EV contigs | Assay 3a variants (~2,400bp) | Assay 3a EV-type (#) | Assay 3b variants (~1,900bp) | Assay 3b EV-type (#) |
| 1      | 105          | CVA13                                  | 812,910   | 4281          | 2          | 2                       | 2                            | EV-A90 (2)           |                              |                      |
| 2      | 70           | Multiple Peaks<br>EV Type Undetermined |           |               |            |                         |                              |                      |                              |                      |
| 3      | 0            | Multiple Peaks<br>EV Type Undetermined | 3,471,817 | 6892          | 51         | 37                      | 15                           | EV-A76 (8)           | 22                           | EV-A76 (14)          |
|        |              |                                        |           |               |            |                         |                              | E14 (1)              |                              | E14 (8)              |
|        |              |                                        |           |               |            |                         |                              | CVA19 (6)            |                              |                      |
|        | 105          | CVA19                                  | 1,290,115 | 2895          | 31         | 20                      | 20                           | CVA19 (20)           |                              |                      |
| 4      | 0            | Multiple Peaks<br>EV Type Undetermined | 866,354   | 1637          | 65         | 48                      | 10                           | EV-A76 (2)           | 38                           | EV-A76 (7)           |
|        |              |                                        |           |               |            |                         |                              | CVA1 (6)             |                              | CVA1 (19)            |
|        |              |                                        |           |               |            |                         |                              | CVA19 (2)            |                              | CVA19 (3)            |
|        |              |                                        |           |               |            |                         |                              |                      |                              | CVA13 (9)            |
|        | 70           | CVA19                                  | 1,589,616 | 3947          | 8          | 2                       | 2                            | CVA19 (2)            |                              |                      |
|        | 105          | CVA19                                  | 1,016,499 | 2941          | 72         | 52                      | 52                           | CVA19 (52)           |                              |                      |
| 5      | 0            | CVA24                                  | 2,980,818 | 4743          | 175        | 118                     | 25                           | CVA24 (23)           | 93                           | CVA24 (80)           |
|        |              |                                        |           |               |            |                         |                              | CVA4 (2)             |                              | CVA4 (13)            |
|        | 28           | CVA24                                  | 395,904   | 1081          | 0          |                         |                              |                      |                              |                      |

|    |     |                                        |           |      |     |     |    |            |     |             |
|----|-----|----------------------------------------|-----------|------|-----|-----|----|------------|-----|-------------|
|    | 70  | Multiple Peaks<br>EV Type Undetermined |           |      |     |     |    |            |     |             |
|    | 105 | CVA1                                   | 1,489,974 | 2625 | 6   | 4   | 4  | CVA1 (4)   |     |             |
| 6  | 28  | Multiple Peaks<br>EV Type Undetermined |           |      |     |     |    |            |     |             |
| 7  | 0   | Multiple Peaks<br>EV Type Undetermined | 1,640,050 | 2853 | 130 | 100 | 45 | EVA76 (12) | 55  | EVA76 (15)  |
|    |     |                                        |           |      |     |     |    | CVA1(21)   |     | CVA1 (25)   |
|    |     |                                        |           |      |     |     |    | CVA13 (1)  |     | CVA13 (15)  |
|    |     |                                        |           |      |     |     |    | CVA11(2)   |     |             |
|    |     |                                        |           |      |     |     |    | CVA19 (9)  |     |             |
|    | 28  | Multiple Peaks<br>EV Type Undetermined |           |      |     |     |    |            |     |             |
|    | 105 | CVA19                                  | 714,114   | 1929 | 16  | 16  | 16 | CVA19 (16) |     |             |
| 8  | 70  | CVA13                                  | 1,378,413 | 3917 | 15  | 12  | 10 | CVA13 (10) | 2   | CVA13 (2)   |
| 9  | 0   | Multiple Peaks<br>EV Type Undetermined | 1,498,698 | 2384 | 240 | 183 | 72 | CVA1(39)   | 111 | CVA1 (92)   |
|    |     |                                        |           |      |     |     |    | CVA19 (33) |     | CVA19 (19)  |
|    | 28  | Multiple Peaks<br>EV Type Undetermined |           |      |     |     |    |            |     |             |
|    | 105 | CVA19                                  | 555,962   | 3305 | 24  | 20  | 20 | CVA19 (20) |     |             |
| 10 | 0   | CVA11                                  | 668,821   | 808  | 113 | 83  | 18 | CVA11 (18) | 65  | CVA11 (65)  |
|    | 105 | CVA11                                  | 1,893,039 | 4164 | 4   | 3   | 2  | CVA11 (2)  | 1   | CVA11 (1)   |
| 11 | 0   | CVA13                                  | 1,864,462 | 4499 | 273 | 209 | 74 | CVA13 (74) | 135 | CVA13 (135) |
|    | 105 | CVA1                                   | 119,868   | 749  | 6   | 2   | 2  | CVA19 (2)  |     |             |
|    |     |                                        |           |      |     | 1   |    |            | 1   | CVA1 (1)    |

|    |              |       |                   |               |              |            |            |           |            |              |
|----|--------------|-------|-------------------|---------------|--------------|------------|------------|-----------|------------|--------------|
| 12 | 70           | CVA19 | 565,365           | 3355          | 7            | 3          | 2          | CVA19 (2) | 1          | CVA19<br>(1) |
| 13 | 70           | CVA11 | 574,410           | 2192          | 5            | 3          | 2          | CVA11 (2) | 1          | CVA11<br>(1) |
|    | <b>Total</b> |       | <b>25,387,209</b> | <b>61,197</b> | <b>1,243</b> | <b>918</b> | <b>393</b> |           | <b>525</b> |              |

**Table S2.** Divergence per EV type and region recovered using LRIS workflow. # means *Number of*

| S/N | EV-Species | EV-Type | Assay 3a               |            |                    |                                     | Assay 3b               |            |                    |                                     |
|-----|------------|---------|------------------------|------------|--------------------|-------------------------------------|------------------------|------------|--------------------|-------------------------------------|
|     |            |         | Maximum divergence (%) | # variants | # positive Samples | # days with positive samples (days) | Maximum divergence (%) | # variants | # positive samples | # days with positive samples (days) |
| 1   | EV-A       | CVA4    | 0.65                   | 2          | 1                  | 1                                   | 0.48                   | 13         | 1                  | 1                                   |
| 2   | EV-A       | EV-A76  | 11.53                  | 22         | 3                  | 1                                   | 9.18                   | 36         | 3                  | 1                                   |
| 3   | EV-A       | EV-A90  | 0.64                   | 2          | 1                  | 1                                   | NA                     | 0          | NA                 | 0                                   |
| 4   | EV-B       | E14     | NA                     | 1          | 1                  | 1                                   | 0.58                   | 8          | 1                  | 1                                   |
| 5   | EV-C       | CVA1    | 26.16                  | 70         | 4                  | 2 (0,105)                           | 20.18                  | 137        | 5                  | 2 (0,105)                           |
| 6   | EV-C       | CVA11   | 17.68                  | 24         | 4                  | 3 (0,70,105)                        | 2.32                   | 67         | 3                  | 3 (0,70,105)                        |
| 7   | EV-C       | CVA13   | 3.73                   | 85         | 3                  | 2 (0,70)                            | 28.08                  | 161        | 4                  | 2 (0,70)                            |
| 8   | EV-C       | CVA19   | 25.01                  | 164        | 11                 | 3 (0,70,105)                        | 15.96                  | 23         | 3                  | 2 (0,70)                            |
| 9   | EV-C       | CVA24   | 1.31                   | 23         | 1                  | 1                                   | 0.96                   | 80         | 1                  | 1                                   |

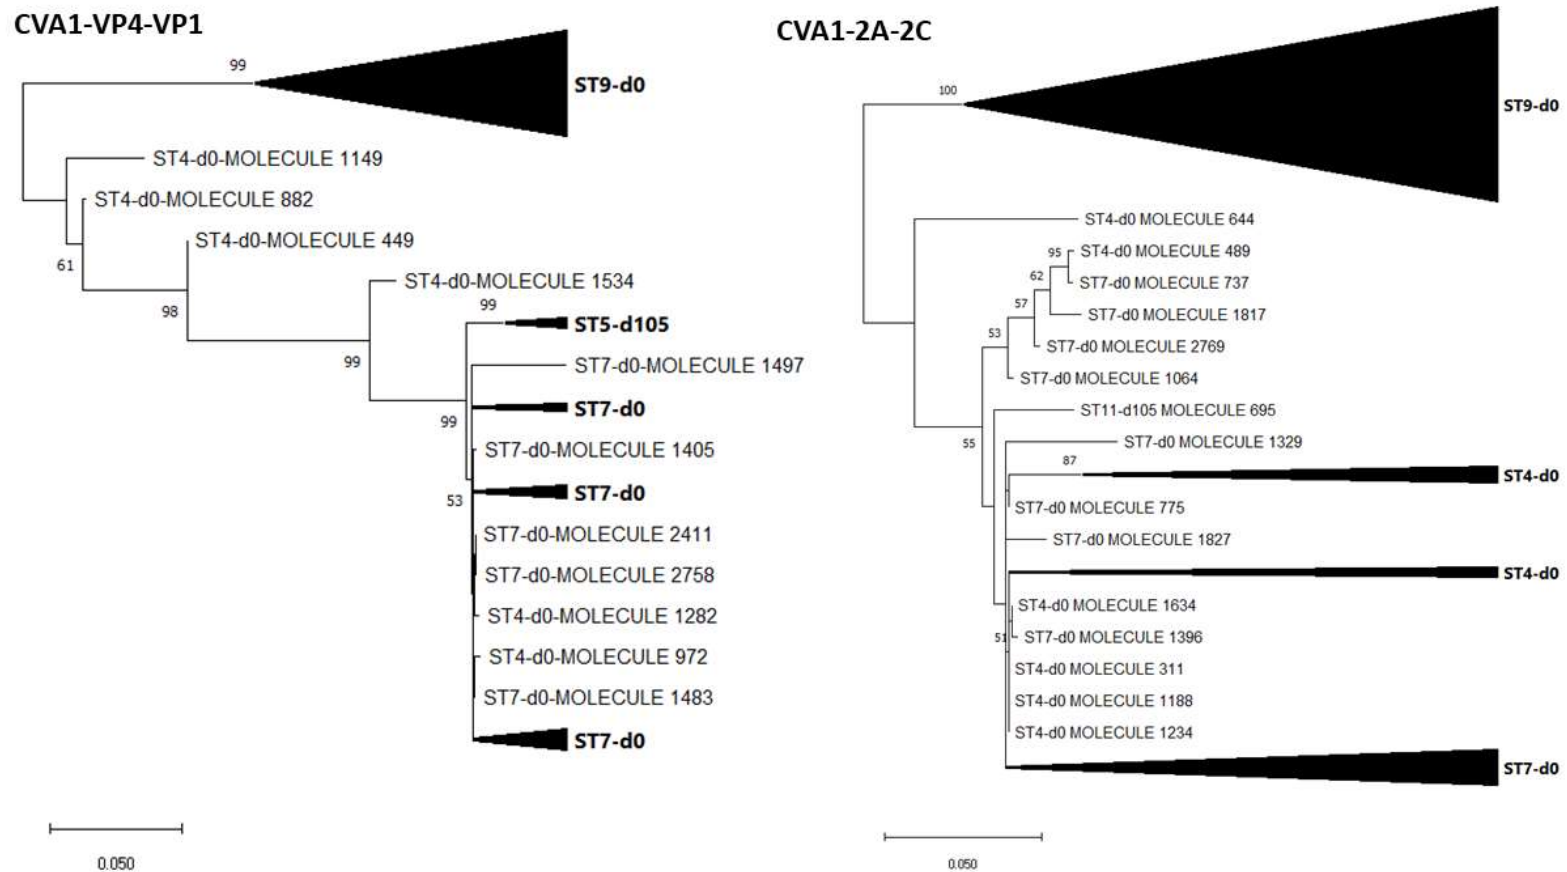

**Figure S1:** Maximum likelihood phylogenetic tree of CVA1 VP4-VP1 and 2A-2C contigs recovered from assay 3 (LRISW) in this study. Bootstrap support is shown if >50. Abbreviation: ST = site. We collapsed taxa for all contigs that belong to the same day and site.

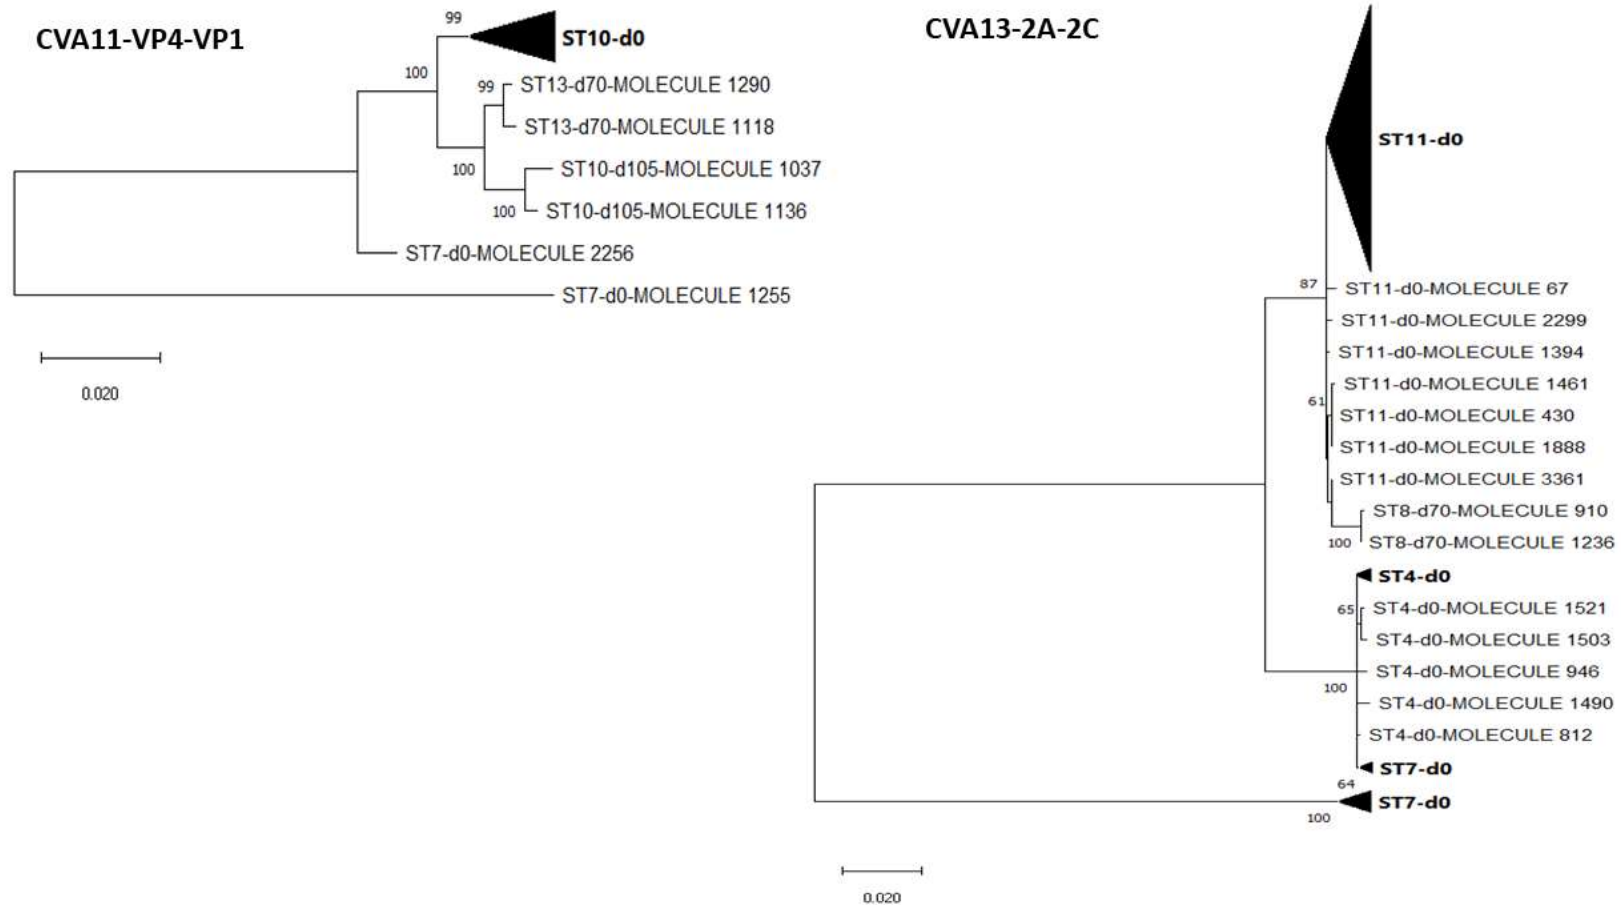

**Figure S2:** Maximum likelihood phylogenetic tree of CVA11 VP4-VP1 and CVA13 2A-2C contigs recovered from assay 3 (LRISW) in this study. Bootstrap support is shown if >50. Abbreviation: ST = site. We collapsed taxa for all contigs that belong to the same day and site.

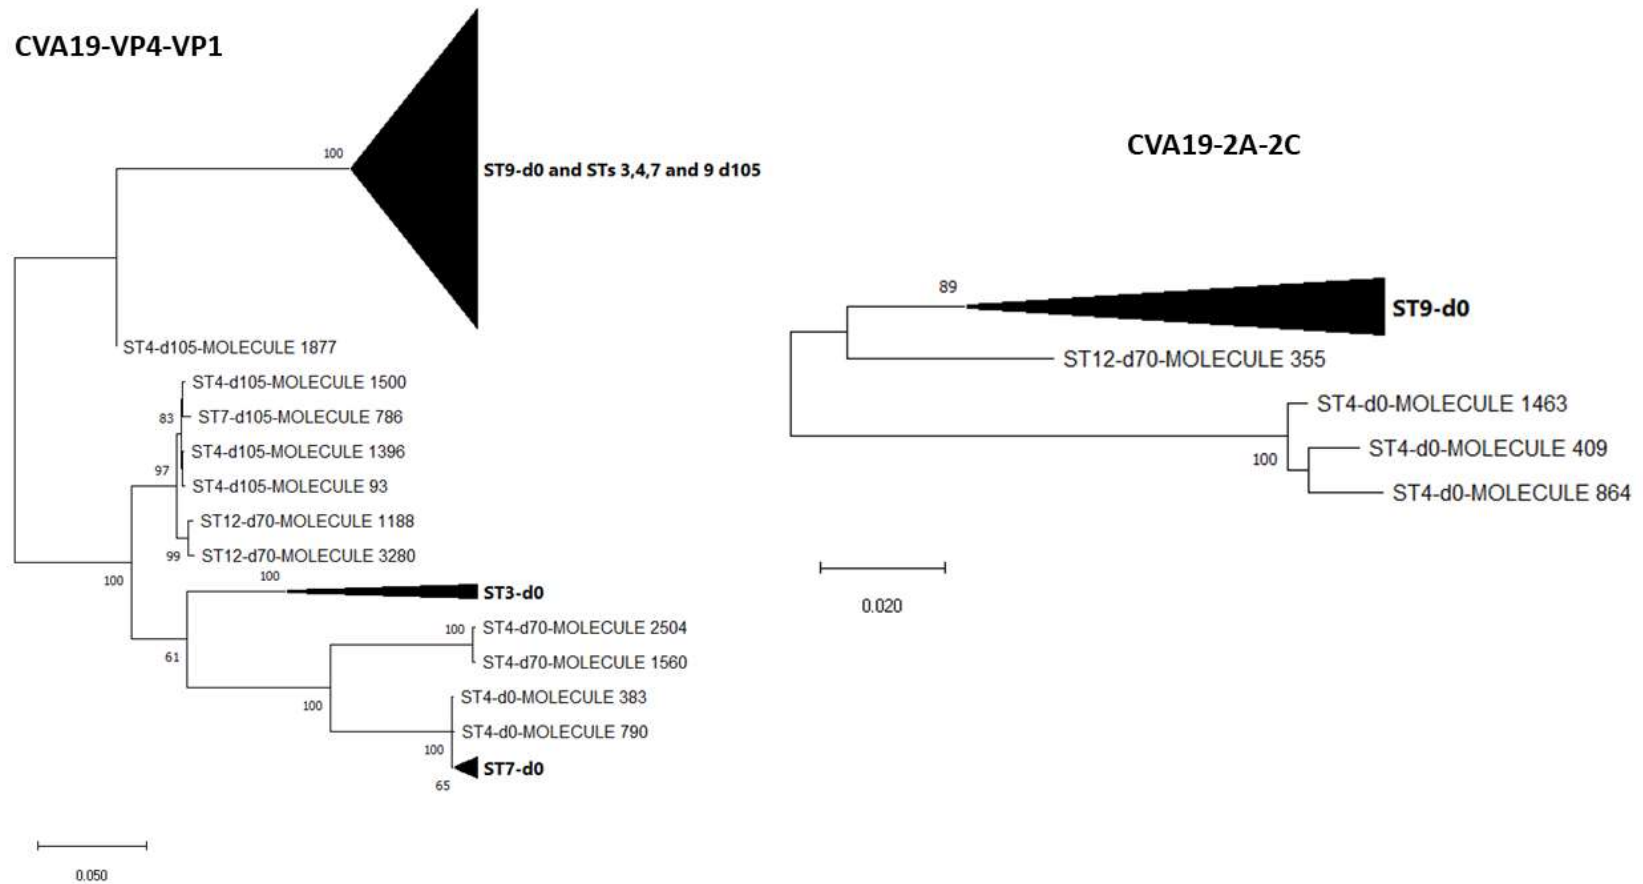

**Figure S3:** Maximum likelihood phylogenetic tree of CVA19 VP4-VP1 and 2A-2C contigs recovered from assay 3 (LRISW) in this study. Bootstrap support is shown if >50. Abbreviation: ST = site. We collapsed taxa for all contigs that belong to the same day and site.

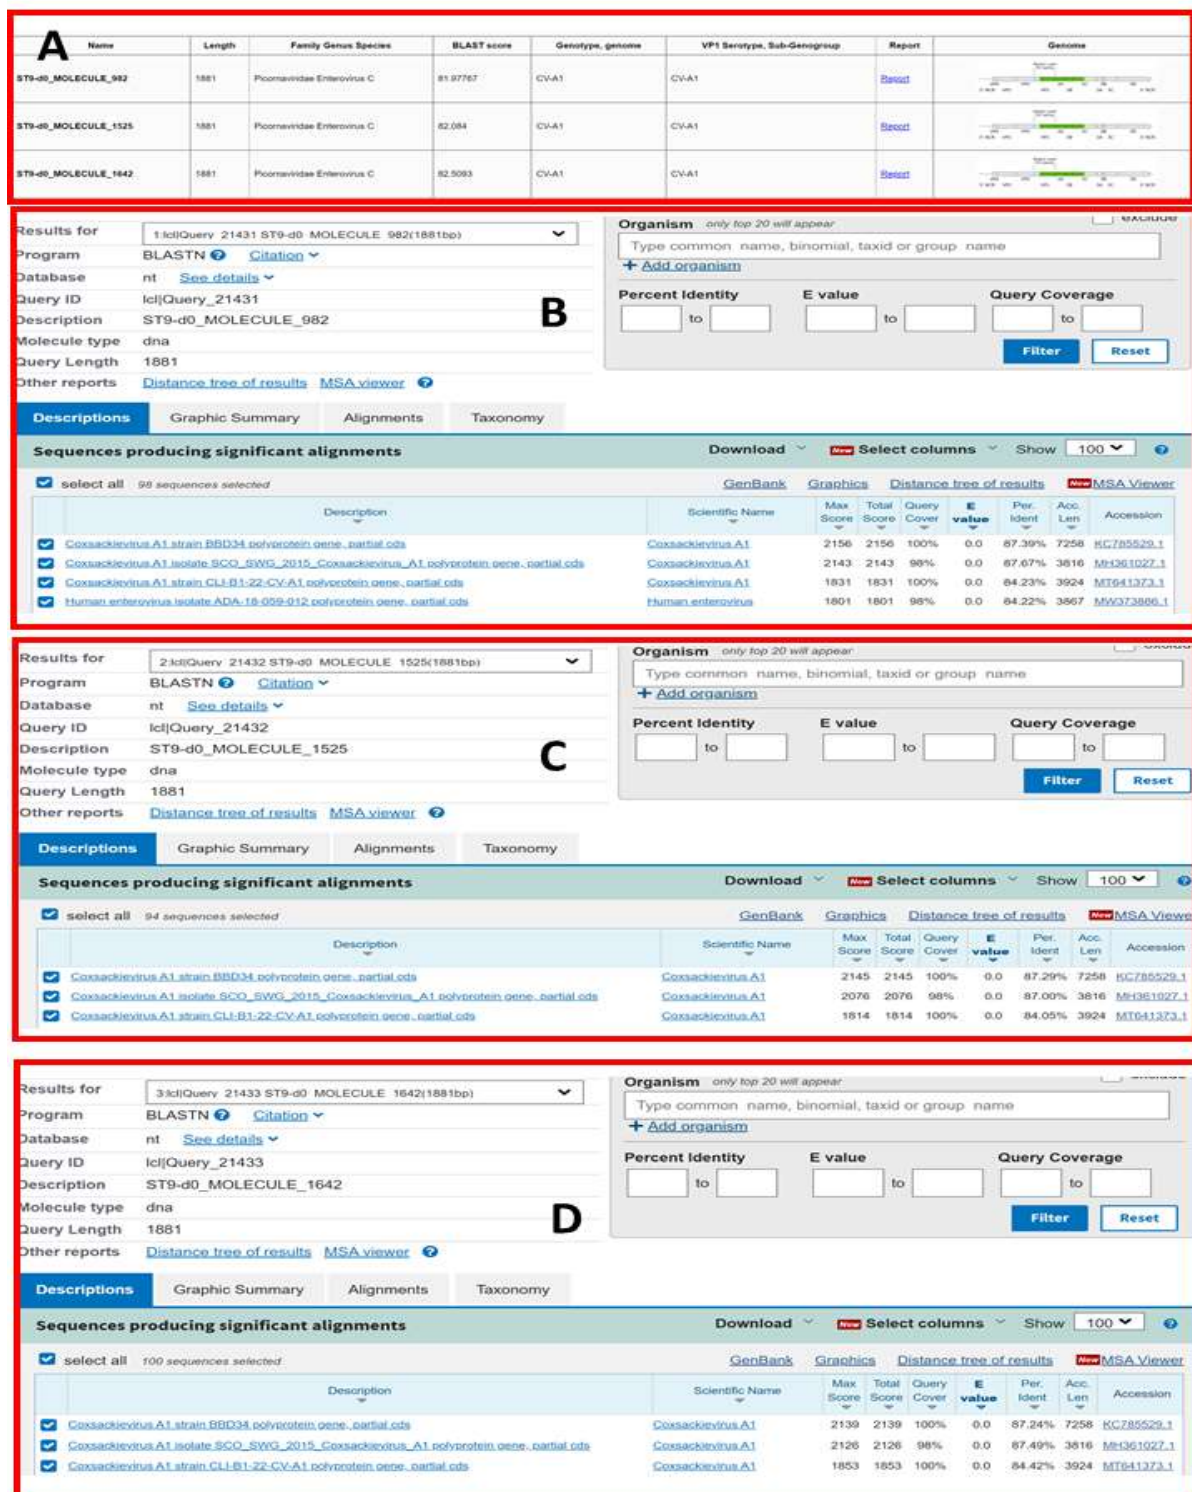

**Figure S4:** Repeat identification of CVA1 contigs 982, 1525 and 1642. A) EGT identification result. B-D) BLASTn results.



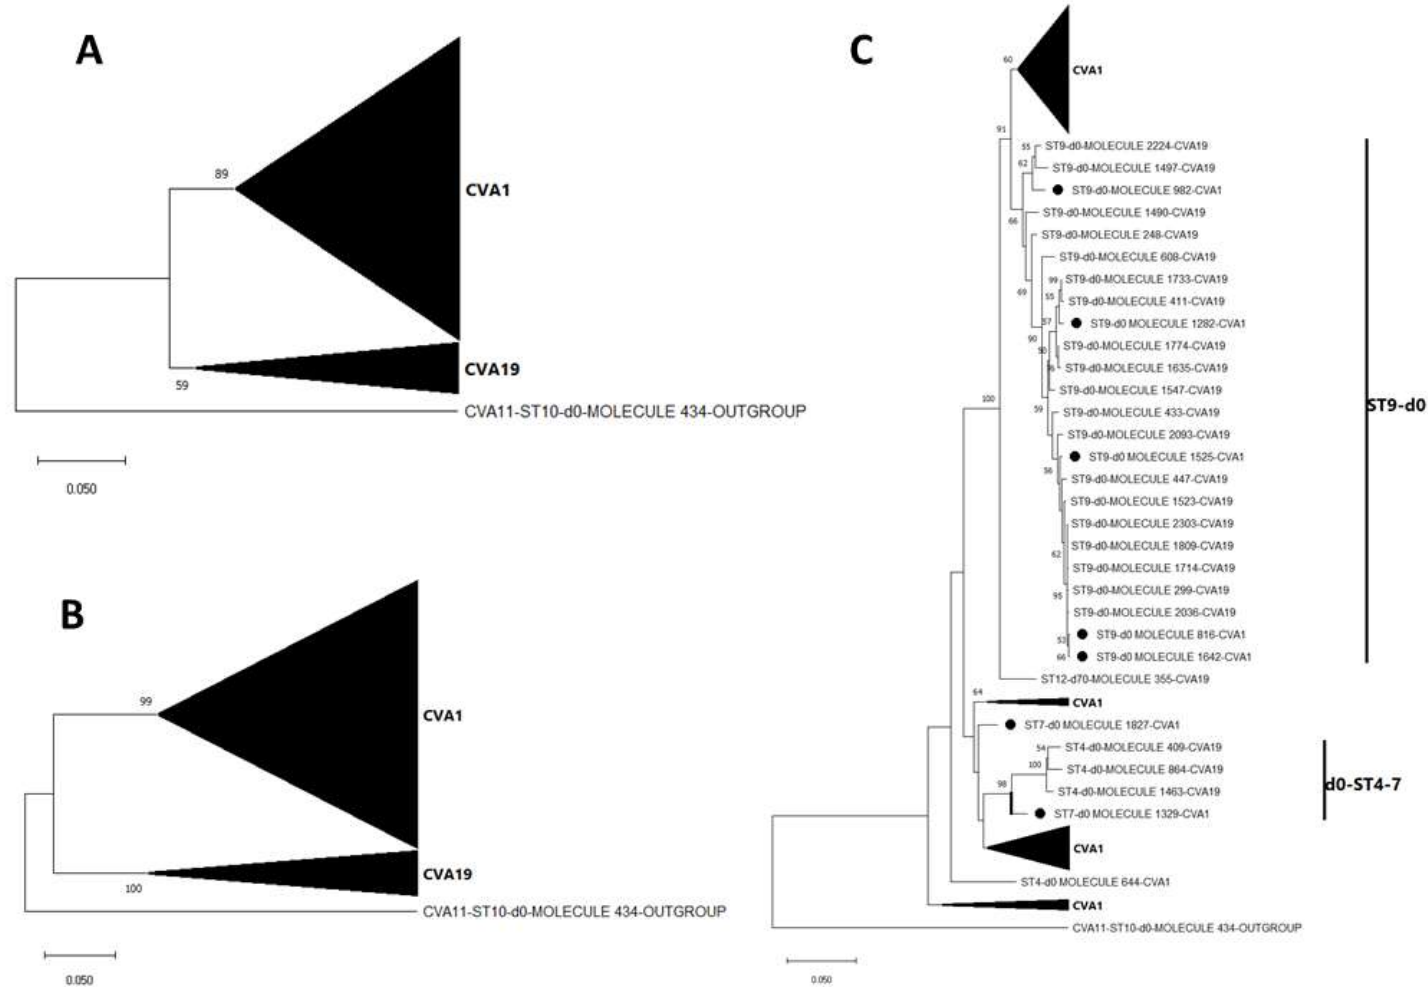

**Figure S5:** Neighbor-Joining phylogenetic tree of CVA1 and CVA19 contigs recovered from assay 3b (LRISW) in this study (A) VP1-2C (B) VP1 only and (C) 2A-2C. In figure S5, the CVA1 contigs that do not cluster with other CVA1s are indicated with black circles. Bootstrap support is shown if >50. Abbreviation: ST = site. We collapsed taxa for all contigs that belong to the same day and site.

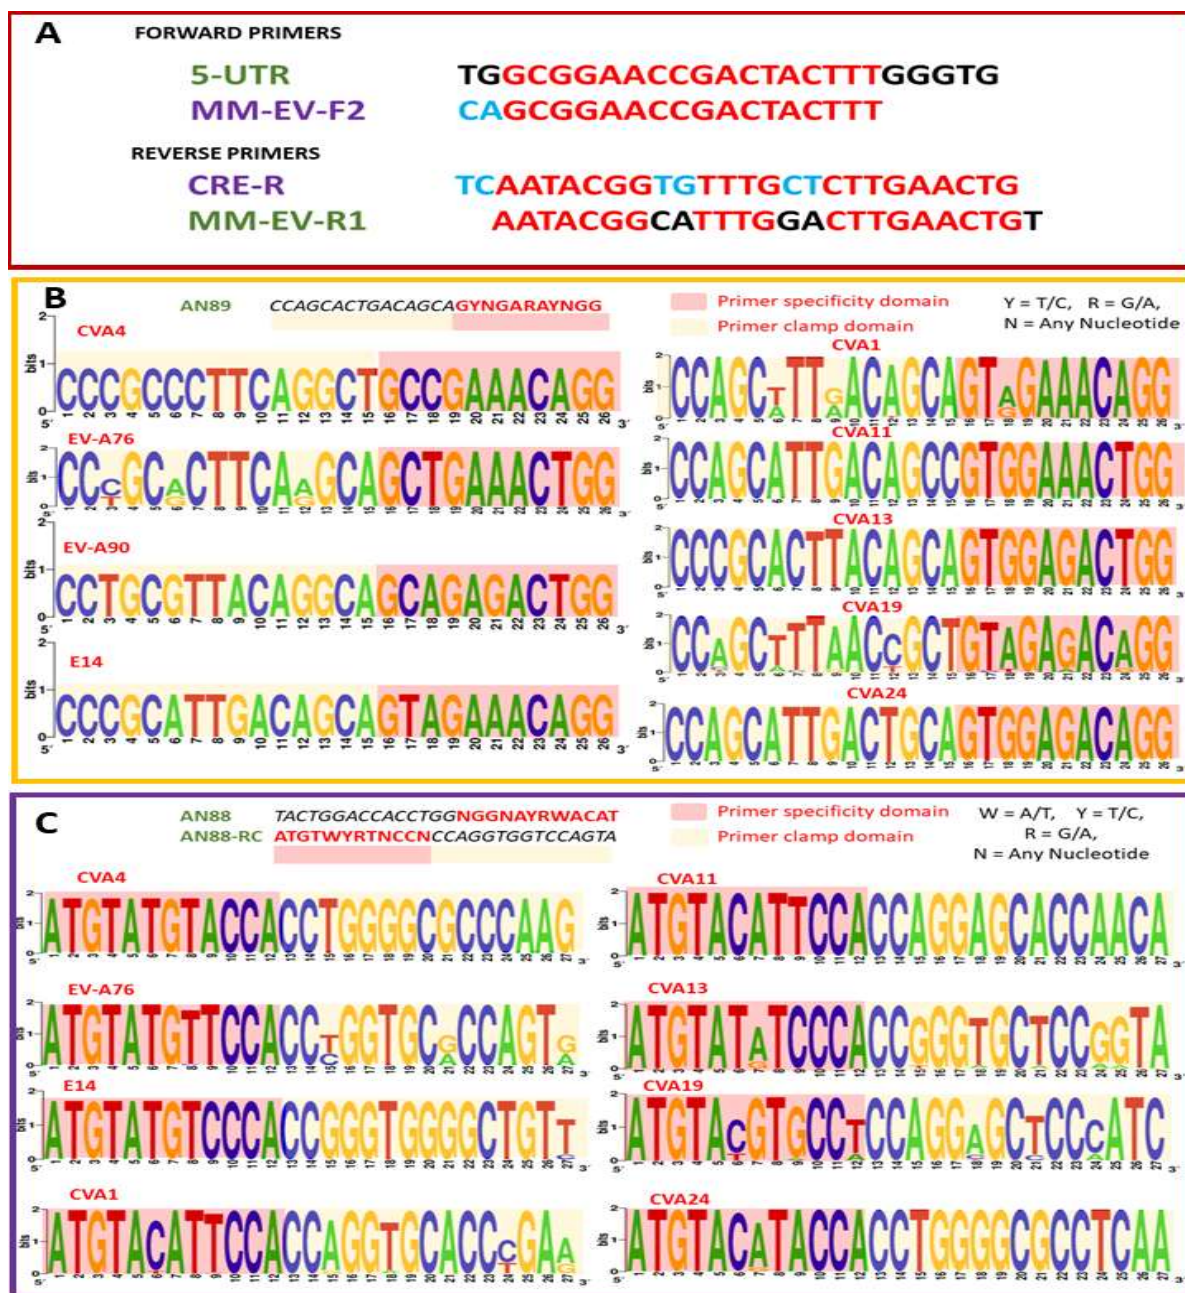

**Figure S6:** (A) Alignment of forward (5-UTR and MM-EV-F2) and reverse (CRE-R and MM-EV-R1) primers used in assay 1a (5-UTR + CRE-R) and 1b (MM-EV-F2 + MM-EV-R1). (B and C) The primer binding sites for AN89 (figure 1b) and AN88 (figure 1c) in all contigs generated in this study. All contigs were aligned by EV type and the primer binding sites were extracted. WebLogo online tool [1] was then used to create a representation of the consensus sequence highlighting variations when present. Primer specificity and clamp domains as described in Nix et al., 2006 are highlighted in pink and yellow, respectively. AN88-RC (figure S1C) means the reverse complement of primer AN88.

## Reference

1. Weblogo available online at <https://weblogo.berkeley.edu/logo.cgi> (accessed on August 30, 2021)
